# Supplementary material for: The effects of salinity on nitrification using halophilic nitrifiers in a Sequencing Batch Reactor treating hypersaline wastewater
Source: PubMed Central journal article supplement (PMC4843016; doi:10.1038/srep24825), 2016-04-25
Supplement: srep24825-s1.pdf [file srep24825-s1.pdf]

The effects of salinity on nitrification using halophilic nitrifiers in a Sequencing Batch  
Reactor treating hypersaline wastewater

You-Wei Cui<sup>1\*</sup>, Hong-Yu Zhang<sup>1</sup>, Jie-ran Ding<sup>1, 2</sup>, Yong-Zhen Peng<sup>1</sup>

1. Beijing University of Technology, College of Energy and Environmental Engineering, 100  
Pingleyuan, Chaoyang District, Beijing 100124, China

2. Environmental Management College of China, 8 Road of Jingang, Beidaihe District,  
Qinhuangdao 066102, China

\* corresponding. cyw@bjut.edu.cn

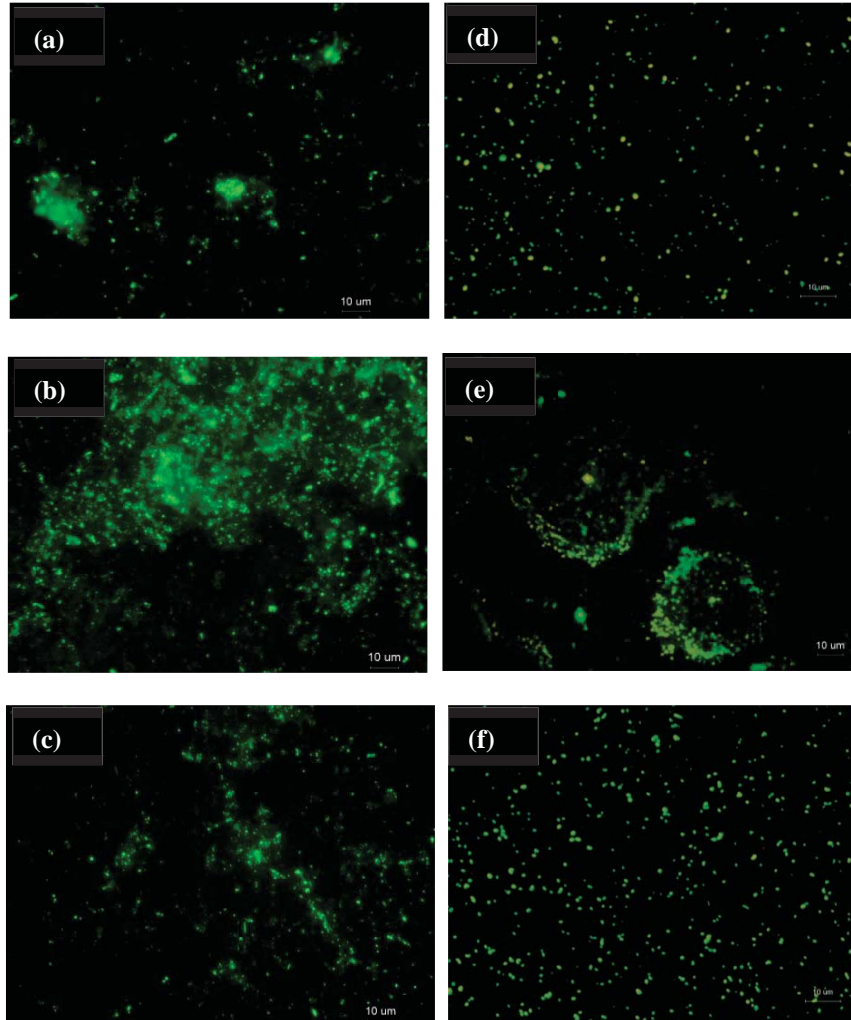

Fig. S1 FISH image of NOB detected using a probe of NIT3/EUB<sub>mix</sub> and NTSPA685/ EUB<sub>mix</sub>. The red color shows bacteria detected only the EUB<sub>mix</sub>. The yellow color shows NOB. (a) NIT3/EUB<sub>mix</sub> hybridization for the inoculated sediment, (b) NIT3/EUB<sub>mix</sub> hybridization for the sludge sampled from phase A, (c) NIT3/EUB<sub>mix</sub> hybridization for the sludge sampled from phase G, (d) NTSPA685/ EUB<sub>mix</sub> hybridization for the inoculated sediment, (e) NTSPA685/ EUB<sub>mix</sub> hybridization for the sludge sampled from phase A, (f) NTSPA685/ EUB<sub>mix</sub> hybridization for the sludge sampled from phase G.

Table S1 Dice coefficients ( $C_s$ ) comparing PCR-DGGE fingerprint similarities

|              | Inoculum | Sample d<br>138 | Sample d<br>164 | Sample d<br>185 | Sample d<br>210 | Sample d<br>287 | Sample d<br>395 |
|--------------|----------|-----------------|-----------------|-----------------|-----------------|-----------------|-----------------|
| Inoculum     | 100      |                 |                 |                 |                 |                 |                 |
| Sample d 138 | 42.1     | 100             |                 |                 |                 |                 |                 |
| Sample d 164 | 52.1     | 58.3            | 100             |                 |                 |                 |                 |
| Sample d 185 | 53.3     | 59.0            | 94.2            | 100             |                 |                 |                 |
| Sample d 210 | 50.1     | 56.9            | 93.4            | 92.3            | 100             |                 |                 |
| Sample d 287 | 45.2     | 42.0            | 70.0            | 68.7            | 66.0            | 100             |                 |
| Sample d 395 | 42.2     | 72.9            | 71.5            | 72.3            | 64.4            | 68.9            | 100             |
